# Supplementary material for: Isolation and complete genome sequence of the thermophilic Geobacillus sp. 12AMOR1 from an Arctic deep-sea hydrothermal vent site
Source: Springer Nature journal article supplement (doi:10.1186/s40793-016-0137-y), 2016-02-24
Supplement: MOESM2 [file 40793_2016_137_MOESM2_ESM.pdf]

| Species                                             | 1.    | 2.    | 3.    | 4.    | 5.    | 6.    | 7.    | 8.    | 9.    | 10.   | 11.   | 12.   | 13.   | 14.   | 15. |
|-----------------------------------------------------|-------|-------|-------|-------|-------|-------|-------|-------|-------|-------|-------|-------|-------|-------|-----|
| 1. <i>Geobacillus</i> sp. 12AMOR1                   | 100   |       |       |       |       |       |       |       |       |       |       |       |       |       |     |
| 2. <i>G. kaustophilus</i> HTA426                    | 39.80 | 100   |       |       |       |       |       |       |       |       |       |       |       |       |     |
| 3. <i>G. stearothermophilus</i> strain X1           | 41.50 | 28.10 | 100   |       |       |       |       |       |       |       |       |       |       |       |     |
| 4. <i>G. stearothermophilus</i> NUB3621 isolate 9A5 | 21.50 | 21.10 | 28.10 | 100   |       |       |       |       |       |       |       |       |       |       |     |
| 5. <i>G. thermoleovorans</i> CCB_US3_UF5            | 40.50 | 82.30 | 27.70 | 20.90 | 100   |       |       |       |       |       |       |       |       |       |     |
| 6. <i>G. thermodenitrificans</i> NG80-2             | 27.50 | 27.30 | 41.80 | 21.50 | 27.50 | 100   |       |       |       |       |       |       |       |       |     |
| 7. <i>G. vulcani</i> PSS1 N685DRAFT                 | 31.50 | 44.00 | 36.40 | 20.70 | 43.80 | 27.20 | 100   |       |       |       |       |       |       |       |     |
| 8. <i>Geobacillus</i> sp. C56-T3                    | 37.80 | 70.30 | 37.70 | 20.30 | 68.50 | 27.10 | 42.90 | 100   |       |       |       |       |       |       |     |
| 9. <i>Geobacillus</i> sp. GHH01                     | 41.50 | 67.40 | 28.40 | 21.10 | 67.50 | 27.10 | 41.60 | 68.80 | 100   |       |       |       |       |       |     |
| 10. <i>Geobacillus</i> sp. JF8                      | 33.00 | 29.50 | 28.50 | 20.30 | 29.50 | 29.60 | 27.90 | 29.30 | 30.40 | 100   |       |       |       |       |     |
| 11. <i>Geobacillus</i> sp. WCH70                    | 30.80 | 28.80 | 27.60 | 29.00 | 29.30 | 23.30 | 22.90 | 25.30 | 27.90 | 23.30 | 100   |       |       |       |     |
| 12. <i>Geobacillus</i> sp. Y4.1MC1                  | 22.10 | 22.20 | 29.90 | 26.70 | 21.70 | 22.20 | 21.40 | 20.40 | 21.90 | 20.70 | 31.30 | 100   |       |       |     |
| 13. <i>Geobacillus</i> sp. Y412MC52                 | 37.40 | 70.00 | 37.90 | 20.30 | 68.90 | 26.90 | 42.90 | 83.59 | 67.80 | 29.40 | 25.80 | 20.30 | 100   |       |     |
| 14. <i>Geobacillus</i> sp. Y412MC61                 | 37.30 | 70.00 | 37.90 | 20.30 | 68.90 | 26.90 | 42.90 | 83.50 | 67.80 | 29.40 | 25.70 | 20.30 | 100   | 100   |     |
| 15. <i>Bacillus licheniformis</i> strain ATCC 14580 | 34.70 | 30.70 | 32.50 | 30.80 | 31.00 | 32.40 | 31.00 | 30.40 | 29.70 | 33.90 | 28.30 | 28.40 | 30.40 | 30.40 | 100 |
